# Supplementary material for: Orderly mitosis shapes interphase genome architecture
Source: eLife. 2026 Apr 21;14:RP108410. doi: 10.7554/eLife.108410 (PMC13099139; doi:10.7554/eLife.108410)
Supplement: Supplementary file 7. [file elife-108410-supp7.xlsx]

## Sheet: Sheet1
RefSeq Accession Number	Gene Symbol	Full Gene Name	Gene ID	siRNA ID	Amount	Exon(s) Targeted	Exon Image	Sense siRNA Sequence	Antisense siRNA Sequence	Validated	Mean RNA Levels Remaining	Plus Error Bar	Minus Error Bar	Validation Cell Line	Matrix 2D Code	Customer Barcode
NM_001012507	C6orf173	chromosome 6 open reading frame 173	387103	s51836	0.25 nmole	Not Determined	Not Available	ACUGUUUGUUCAUCGAUUAtt	UAAUCGAUGAACAAACAGUaa						00CSI0BF0E
NM_001012507	C6orf173	chromosome 6 open reading frame 173	387103	s51837	0.25 nmole	Not Determined	Not Available	GCUUGUGCGAGUAAAUGUAtt	UACAUUUACUCGCACAAGCgt						00CSI0AUT9
NM_001012507	C6orf173	chromosome 6 open reading frame 173	387103	s51838	0.25 nmole	Not Determined	Not Available	CAUCUGAACUGUUUACUGUtt	ACAGUAAACAGUUCAGAUGga						00CSI0DKHR
NM_001810	CENPB	centromere protein B, 80kDa	1059	s2909	0.25 nmole	1	http://www.ambion.com/catalog/exon_sirna.php?id=2909	CCAGUUUGAUUUCAAUAAAtt	UUUAUUGAAAUCAAACUGGga						00CSI0BN03
NM_001810	CENPB	centromere protein B, 80kDa	1059	s2910	0.25 nmole	1	http://www.ambion.com/catalog/exon_sirna.php?id=2910	CGCUGAGCACGAUCCUGAAtt	UUCAGGAUCGUGCUCAGCGtg						00CSI0B58X
NM_001810	CENPB	centromere protein B, 80kDa	1059	s2911	0.25 nmole	1	http://www.ambion.com/catalog/exon_sirna.php?id=2911	CCAACAAGCUGUCUCCCUAtt	UAGGGAGACAGCUUGUUGGtc						00CSI0BQSF
NM_005483	CHAF1A	chromatin assembly factor 1, subunit A (p150)	10036	s19499	0.25 nmole	3	http://www.ambion.com/catalog/exon_sirna.php?id=19499	GCCUGAAUCUUGUCCCAAAtt	UUUGGGACAAGAUUCAGGCgc						00CSI20J29
NM_005483	CHAF1A	chromatin assembly factor 1, subunit A (p150)	10036	s19500	0.25 nmole	3	http://www.ambion.com/catalog/exon_sirna.php?id=19500	GAAGAAGACUCUGUACUCAtt	UGAGUACAGAGUCUUCUUCgg						00CSI20KK9
NM_005483	CHAF1A	chromatin assembly factor 1, subunit A (p150)	10036	s19501	0.25 nmole	3	http://www.ambion.com/catalog/exon_sirna.php?id=19501	CGAAACUUGUCAACGGGAAtt	UUCCCGUUGACAAGUUUCGgt						00CSI22R03
NM_005441	CHAF1B	chromatin assembly factor 1, subunit B (p60)	8208	s15704	0.25 nmole	7	http://www.ambion.com/catalog/exon_sirna.php?id=15704	CGAGUAUACAGUAUACAGAtt	UCUGUAUACUGUAUACUCGca						00CSI22R4M
NM_005441	CHAF1B	chromatin assembly factor 1, subunit B (p60)	8208	s15705	0.25 nmole	12	http://www.ambion.com/catalog/exon_sirna.php?id=15705	GGACGGUUACUGCUCAUUUtt	AAAUGAGCAGUAACCGUCCgt						00CSI21OGQ
NM_005441	CHAF1B	chromatin assembly factor 1, subunit B (p60)	8208	s15706	0.25 nmole	2	http://www.ambion.com/catalog/exon_sirna.php?id=15706	GGAUCUGGAAGGUAGAAAAtt	UUUUCUACCUUCCAGAUCCtg						00CSI210NU
NM_001008938	CKAP5	cytoskeleton associated protein 5	9793	s18929	0.25 nmole	13,13	http://www.ambion.com/catalog/exon_sirna.php?id=18929	GACUAGCUGCUGAUAAGAAtt	UUCUUAUCAGCAGCUAGUCca						00CSI21RL9
NM_001008938	CKAP5	cytoskeleton associated protein 5	9793	s18927	0.25 nmole	31,31	http://www.ambion.com/catalog/exon_sirna.php?id=18927	CAAAGGAUGUCAUUCGUAAtt	UUACGAAUGACAUCCUUUGgt						00CSI21N61
NM_001008938	CKAP5	cytoskeleton associated protein 5	9793	s18928	0.25 nmole	39,38	http://www.ambion.com/catalog/exon_sirna.php?id=18928	GGAGAAUGGUUCGACUGUUtt	AACAGUCGAACCAUUCUCCag						00CSI21MVR
NM_004728	DDX21	DEAD (Asp-Glu-Ala-Asp) box polypeptide 21	9188	s17563	0.25 nmole	14	http://www.ambion.com/catalog/exon_sirna.php?id=17563	CUACCGCAUCAGUAACAGAtt	UCUGUUACUGAUGCGGUAGgt						00CSI23NOS
NM_004728	DDX21	DEAD (Asp-Glu-Ala-Asp) box polypeptide 21	9188	s17564	0.25 nmole	5	http://www.ambion.com/catalog/exon_sirna.php?id=17564	GGAGGUCAAUUUGAACGCAtt	UGCGUUCAAAUUGACCUCCat						00CSI23NNV
NM_004728	DDX21	DEAD (Asp-Glu-Ala-Asp) box polypeptide 21	9188	s17565	0.25 nmole	10	http://www.ambion.com/catalog/exon_sirna.php?id=17565	GGAAUUAAGUUCAAACGAAtt	UUCGUUUGAACUUAAUUCCcg						00CSI24F62
NM_001436	FBL	fibrillarin	2091	s4820	0.25 nmole	Not Determined	Not Available	AGUUUAUGGAGAGAAGAGAtt	UCUCUUCUCUCCAUAAACUga						00CSI2295W
NM_001436	FBL	fibrillarin	2091	s4821	0.25 nmole	Not Determined	Not Available	UGACAUCGUUGGUCCGGAUtt	AUCCGGACCAACGAUGUCAga						00CSI21M9B
NM_001436	FBL	fibrillarin	2091	s4822	0.25 nmole	Not Determined	Not Available	CCUCCGAAGUGAAAAAGAUtt	AUCUUUUUCACUUCGGAGGca						00CSI22R2R
NM_015443	KIAA1267	KIAA1267	284058	s49461	0.25 nmole	13	http://www.ambion.com/catalog/exon_sirna.php?id=49461	GGAUACCCGUUGUUCCACAtt	UGUGGAACAACGGGUAUCCtc						00CSI223FY
NM_015443	KIAA1267	KIAA1267	284058	s49462	0.25 nmole	1	http://www.ambion.com/catalog/exon_sirna.php?id=49462	CCAGCCUAGAUUUCCGAAAtt	UUUCGGAAAUCUAGGCUGGga						00CSI222TU
NM_015443	KIAA1267	KIAA1267	284058	s49463	0.25 nmole	1	http://www.ambion.com/catalog/exon_sirna.php?id=49463	GCCUAGAUUUCCGAAAUAAtt	UUAUUUCGGAAAUCUAGGCtg						00CSI0EYHK
NM_170708	LMNA	lamin A/C	4000	s8221	0.25 nmole	Not Determined	Not Available	CCAAAAAGCGCAAACUGGAtt	UCCAGUUUGCGCUUUUUGGtg						00CSI22X00
NM_170708	LMNA	lamin A/C	4000	s8222	0.25 nmole	Not Determined	Not Available	GAAGGAGGGUGACCUGAUAtt	UAUCAGGUCACCCUCCUUCtt						00CSI0BPCD
NM_170708	LMNA	lamin A/C	4000	s8223	0.25 nmole	Not Determined	Not Available	CCACCAAAGUUCACCCUGAtt	UCAGGGUGAACUUUGGUGGga						00CSI2115Q
NM_002417	MKI67	antigen identified by monoclonal antibody Ki-67	4288	s8797	0.25 nmole	Not Determined	Not Available	CAUCAACGCGUUUAGGGAAtt	UUCCCUAAACGCGUUGAUGct						00CSI0FQV7
NM_002417	MKI67	antigen identified by monoclonal antibody Ki-67	4288	s8798	0.25 nmole	Not Determined	Not Available	GUACCAUAAUAAUAGGGAAtt	UUCCCUAUUAUUAUGGUACaa						00CSI20S75
NM_002417	MKI67	antigen identified by monoclonal antibody Ki-67	4288	s8796	0.25 nmole	Not Determined	Not Available	CGUCGUGUCUCAAGAUCUAtt	UAGAUCUUGAGACACGACGtg						00CSI21NPZ
NM_022045	MTBP	Mdm2, transformed 3T3 cell double minute 2, p53 binding protein (mouse) binding protein, 104kDa	27085	s25786	0.25 nmole	18	http://www.ambion.com/catalog/exon_sirna.php?id=25786	GUAUCCCGAUUGAAACGGAtt	UCCGUUUCAAUCGGGAUACtt						00CSI0AHV4
NM_022045	MTBP	Mdm2, transformed 3T3 cell double minute 2, p53 binding protein (mouse) binding protein, 104kDa	27085	s25787	0.25 nmole	9	http://www.ambion.com/catalog/exon_sirna.php?id=25787	GAGUUAGGAUUGACAAACAtt	UGUUUGUCAAUCCUAACUCaa						00CSI0AMHB
NM_022045	MTBP	Mdm2, transformed 3T3 cell double minute 2, p53 binding protein (mouse) binding protein, 104kDa	27085	s25788	0.25 nmole	18	http://www.ambion.com/catalog/exon_sirna.php?id=25788	CGAACUGAAGUAUCCCGAUtt	AUCGGGAUACUUCAGUUCGaa						00CSI0D8AX
NM_015261	NCAPD3	non-SMC condensin II complex, subunit D3	23310	s23530	0.25 nmole	10	http://www.ambion.com/catalog/exon_sirna.php?id=23530	GAUAAAUCAGAGUAUCGUAtt	UACGAUACUCUGAUUUAUCta						00CSI21NTA
NM_015261	NCAPD3	non-SMC condensin II complex, subunit D3	23310	s23531	0.25 nmole	26	http://www.ambion.com/catalog/exon_sirna.php?id=23531	GAACAGCGAUUCAACAUCAtt	UGAUGUUGAAUCGCUGUUCat						00CSI0BGV2
NM_015261	NCAPD3	non-SMC condensin II complex, subunit D3	23310	s23532	0.25 nmole	1	http://www.ambion.com/catalog/exon_sirna.php?id=23532	CGCUGGAUCUUAGACUCGAtt	UCGAGUCUAAGAUCCAGCGga						00CSI24F66
NM_022346	NCAPG	non-SMC condensin I complex, subunit G	64151	s34513	0.25 nmole	2	http://www.ambion.com/catalog/exon_sirna.php?id=34513	GGUGGUCUAUAAACGUGAAtt	UUCACGUUUAUAGACCACCat						00CSI20SL3
NM_022346	NCAPG	non-SMC condensin I complex, subunit G	64151	s34514	0.25 nmole	1	http://www.ambion.com/catalog/exon_sirna.php?id=34514	CACGAUGGAUGAUAAGACAtt	UGUCUUAUCAUCCAUCGUGcg						00CSI22RAW
NM_022346	NCAPG	non-SMC condensin I complex, subunit G	64151	s34515	0.25 nmole	10	http://www.ambion.com/catalog/exon_sirna.php?id=34515	CUGUUGGUGUUAAUAACGAtt	UCGUUAUUAACACCAACAGta						00CSI21NWN
NM_152299	NCAPH2	non-SMC condensin II complex, subunit H2	29781	s26584	0.25 nmole	Not Determined	Not Available	GGUGGAAUACCUCUACUCAtt	UGAGUAGAGGUAUUCCACCtt						00CSI0AHEZ
NM_152299	NCAPH2	non-SMC condensin II complex, subunit H2	29781	s26585	0.25 nmole	Not Determined	Not Available	GGCCCUUGAUUUCAUCUCUtt	AGAGAUGAAAUCAAGGGCCtg						00CSI21MW9
NM_152299	NCAPH2	non-SMC condensin II complex, subunit H2	29781	s26586	0.25 nmole	Not Determined	Not Available	GGACUAACGUGGAUCUCAAtt	UUGAGAUCCACGUUAGUCCgg						00CSI21OOI
NM_005381	NCL	nucleolin	4691	s9312	0.25 nmole	12	http://www.ambion.com/catalog/exon_sirna.php?id=9312	GGAUAGUUACUGACCGGGAtt	UCCCGGUCAGUAACUAUCCtt						00CSI20QTL
NM_005381	NCL	nucleolin	4691	s9313	0.25 nmole	8	http://www.ambion.com/catalog/exon_sirna.php?id=9313	GCGGAGAUCAGAUUAGUCAtt	UGACUAAUCUGAUCUCCGCag						00CSI20WQK
NM_005381	NCL	nucleolin	4691	s9314	0.25 nmole	9	http://www.ambion.com/catalog/exon_sirna.php?id=9314	CACUUGGAGUGGUGAAUCAtt	UGAUUCACCACUCCAAGUGct						00CSI20RPN
NM_006101	NDC80	NDC80 homolog, kinetochore complex component (S. cerevisiae)	10403	s20350	0.25 nmole	Not Determined	Not Available	GGAGGAUACUUUAGAACAAtt	UUGUUCUAAAGUAUCCUCCaa						00CSI20SBG
NM_006101	NDC80	NDC80 homolog, kinetochore complex component (S. cerevisiae)	10403	s20351	0.25 nmole	Not Determined	Not Available	GGAAAUUGCUAGAGUAGAAtt	UUCUACUCUAGCAAUUUCCtc						00CSI20YH6
NM_006101	NDC80	NDC80 homolog, kinetochore complex component (S. cerevisiae)	10403	s20352	0.25 nmole	Not Determined	Not Available	CGUCUAGAGUCGUUGAGAAtt	UUCUCAACGACUCUAGACGat						00CSI0C31R
NM_002520	NPM1	nucleophosmin (nucleolar phosphoprotein B23, numatrin)	4869	s9676	0.25 nmole	Not Determined	Not Available	CGACAAAGAUUAUCACUUUtt	AAAGUGAUAAUCUUUGUCGgc						00CSI20S96
NM_002520	NPM1	nucleophosmin (nucleolar phosphoprotein B23, numatrin)	4869	s9677	0.25 nmole	Not Determined	Not Available	GCAAUGAAUUACGAAGGCAtt	UGCCUUCGUAAUUCAUUGCct						00CSI23IX6
NM_002520	NPM1	nucleophosmin (nucleolar phosphoprotein B23, numatrin)	4869	s9678	0.25 nmole	Not Determined	Not Available	CUAUCUUUUCGGUUGUGAAtt	UUCACAACCGAAAAGAUAGtt						00CSI2116I
NM_145697	NUF2	NUF2, NDC80 kinetochore complex component	83540	s37981	0.25 nmole	6,6	http://www.ambion.com/catalog/exon_sirna.php?id=37981	GCAUGCCGUGAAACGUAUAtt	UAUACGUUUCACGGCAUGCtt						00CSI0BW2I
NM_145697	NUF2	NUF2, NDC80 kinetochore complex component	83540	s37982	0.25 nmole	3,3	http://www.ambion.com/catalog/exon_sirna.php?id=37982	GGAAUUCGACUGGAACAUUtt	AAUGUUCCAGUCGAAUUCCat						00CSI24F63
NM_145697	NUF2	NUF2, NDC80 kinetochore complex component	83540	s37983	0.25 nmole	10,10	http://www.ambion.com/catalog/exon_sirna.php?id=37983	GAUACGGUCCAGAAGCUUAtt	UAAGCUUCUGGACCGUAUCtt						00CSI0BCSN
NM_015231	NUP160	nucleoporin 160kDa	23279	s23466	0.25 nmole	13	http://www.ambion.com/catalog/exon_sirna.php?id=23466	GUUUCGAAAUUUACAACAAtt	UUGUUGUAAAUUUCGAAACtc						00CSI0BTD0
NM_015231	NUP160	nucleoporin 160kDa	23279	s23464	0.25 nmole	8	http://www.ambion.com/catalog/exon_sirna.php?id=23464	CACUGAGAGUAAUCGCUAUtt	AUAGCGAUUACUCUCAGUGct						00CSI24F64
NM_015231	NUP160	nucleoporin 160kDa	23279	s23465	0.25 nmole	2	http://www.ambion.com/catalog/exon_sirna.php?id=23465	GGCAAGUUGUUCUCCGUAAtt	UUACGGAGAACAACUUGCCac						00CSI24F65
NM_024844	NUP85	nucleoporin 85kDa	79902	s36610	0.25 nmole	3	http://www.ambion.com/catalog/exon_sirna.php?id=36610	GACGAAGAGUUGACUGGAAtt	UUCCAGUCAACUCUUCGUCaa						00CSI0BC7Y
NM_024844	NUP85	nucleoporin 85kDa	79902	s36611	0.25 nmole	14	http://www.ambion.com/catalog/exon_sirna.php?id=36611	GGAUACCUCUGAACACCGAtt	UCGGUGUUCAGAGGUAUCCgc						00CSI24F61
NM_024844	NUP85	nucleoporin 85kDa	79902	s36612	0.25 nmole	10	http://www.ambion.com/catalog/exon_sirna.php?id=36612	CCAUUGAUCUGCACUACUAtt	UAGUAGUGCAGAUCAAUGGgt						00CSI21YRC
NM_182649	PCNA	proliferating cell nuclear antigen	5111	s10133	0.25 nmole	5,4	http://www.ambion.com/catalog/exon_sirna.php?id=10133	CGUAUAUGCCGAGAUCUCAtt	UGAGAUCUCGGCAUAUACGtg						00CSI20K4W
NM_182649	PCNA	proliferating cell nuclear antigen	5111	s10134	0.25 nmole	5,4	http://www.ambion.com/catalog/exon_sirna.php?id=10134	GGAGUGAAAUUUUCUGCAAtt	UUGCAGAAAAUUUCACUCCgt						00CSI22R1Y
NM_182649	PCNA	proliferating cell nuclear antigen	5111	s10135	0.25 nmole	3,2	http://www.ambion.com/catalog/exon_sirna.php?id=10135	GAAGAUAUCAUUACACUAAtt	UUAGUGUAAUGAUAUCUUCat						00CSI23HOT
NM_018715	RCC2	regulator of chromosome condensation 2	55920	s31780	0.25 nmole	Not Determined	Not Available	CAAACGUGGUUGUACGAGAtt	UCUCGUACAACCACGUUUGgt						00CSI0AILQ
NM_018715	RCC2	regulator of chromosome condensation 2	55920	s31781	0.25 nmole	Not Determined	Not Available	GAAUCUACCAUGUACCCAAtt	UUGGGUACAUGGUAGAUUCac						00CSI21178
NM_018715	RCC2	regulator of chromosome condensation 2	55920	s31782	0.25 nmole	Not Determined	Not Available	GGGCACAGCGGAUAGAGUAtt	UACUCUAUCCGCUGUGCCCgg						00CSI0B0SO
NM_015571	SENP6	SUMO1/sentrin specific peptidase 6	26054	s25023	0.25 nmole	Not Determined	Not Available	CAACGACAGAACUAACAGAtt	UCUGUUAGUUCUGUCGUUGtc						00CSI20MV8
NM_015571	SENP6	SUMO1/sentrin specific peptidase 6	26054	s25024	0.25 nmole	Not Determined	Not Available	GCACCUUUAGGCGAAGGAAtt	UUCCUUCGCCUAAAGGUGCtt						00CSI20MV9
NM_015571	SENP6	SUMO1/sentrin specific peptidase 6	26054	s25025	0.25 nmole	Not Determined	Not Available	CAGACUAAACUAUAGCGAUtt	AUCGCUAUAGUUUAGUCUGat						00CSI20MVA
NM_182513	SPC24	SPC24, NDC80 kinetochore complex component, homolog (S. cerevisiae)	147841	s45066	0.25 nmole	Not Determined	Not Available	AGAGCCUUCUCAAUGCGAAtt	UUCGCAUUGAGAAGGCUCUgg						00CSI0ATWQ
NM_182513	SPC24	SPC24, NDC80 kinetochore complex component, homolog (S. cerevisiae)	147841	s45067	0.25 nmole	Not Determined	Not Available	CAACUUUACCACCAAGUUAtt	UAACUUGGUGGUAAAGUUGag						00CSI0BLFX
NM_182513	SPC24	SPC24, NDC80 kinetochore complex component, homolog (S. cerevisiae)	147841	s45065	0.25 nmole	Not Determined	Not Available	GGAAAUUCAUCAGCGACUAtt	UAGUCGCUGAUGAAUUUCCtg						00CSI0C0GR
NM_003169	SUPT5H	suppressor of Ty 5 homolog (S. cerevisiae)	6829	s13631	0.25 nmole	Not Determined	Not Available	GGGUAACCACUGACAUUCAtt	UGAAUGUCAGUGGUUACCCag						00CSI21MAK
NM_003169	SUPT5H	suppressor of Ty 5 homolog (S. cerevisiae)	6829	s13632	0.25 nmole	Not Determined	Not Available	GAACUGGGCGAGUAUUACAtt	UGUAAUACUCGCCCAGUUCtt						00CSI23RPJ
NM_003169	SUPT5H	suppressor of Ty 5 homolog (S. cerevisiae)	6829	s13633	0.25 nmole	Not Determined	Not Available	GGACAUUCUAGAGAAAGAAtt	UUCUUUCUCUAGAAUGUCCtc						00CSI21NX4
NM_152259	TICRR	TOPBP1-interacting checkpoint and replication regulator	90381	s40361	0.25 nmole	4	http://www.ambion.com/catalog/exon_sirna.php?id=40361	CAGAUGUUGUGGAUAGUAUtt	AUACUAUCCACAACAUCUGag						00CSI23IX5
NM_152259	TICRR	TOPBP1-interacting checkpoint and replication regulator	90381	s40362	0.25 nmole	20	http://www.ambion.com/catalog/exon_sirna.php?id=40362	GUACCUCUCUUGAAACGAAtt	UUCGUUUCAAGAGAGGUACct						00CSI221AV
NM_152259	TICRR	TOPBP1-interacting checkpoint and replication regulator	90381	s40363	0.25 nmole	20	http://www.ambion.com/catalog/exon_sirna.php?id=40363	GACUCACCAUUGGAUUCAAtt	UUGAAUCCAAUGGUGAGUCat						00CSI0B099
NM_001002926	TWISTNB	TWIST neighbor	221830	s48115	0.25 nmole	1	http://www.ambion.com/catalog/exon_sirna.php?id=48115	GCCUUUUAGGUGUCCCUAUtt	AUAGGGACACCUAAAAGGCtc						00CSI0C0VA
NM_001002926	TWISTNB	TWIST neighbor	221830	s48116	0.25 nmole	3	http://www.ambion.com/catalog/exon_sirna.php?id=48116	CAUGGGUGAUGAACUAGAAtt	UUCUAGUUCAUCACCCAUGtt						00CSI22H2E
NM_001002926	TWISTNB	TWIST neighbor	221830	s48117	0.25 nmole	2	http://www.ambion.com/catalog/exon_sirna.php?id=48117	GAAGCUUAUGGGUAUAGUUtt	AACUAUACCCAUAAGCUUCtg						00CSI24FAC
NM_003345	UBE2I	ubiquitin-conjugating enzyme E2I (UBC9 homolog, yeast)	7329	s14589	0.25 nmole	5,6,5,5	http://www.ambion.com/catalog/exon_sirna.php?id=14589	AAACAGAUCCUAUUAGGAAtt	UUCCUAAUAGGAUCUGUUUga						00CSI0FR7X
NM_003345	UBE2I	ubiquitin-conjugating enzyme E2I (UBC9 homolog, yeast)	7329	s14590	0.25 nmole	6,7,6,6	http://www.ambion.com/catalog/exon_sirna.php?id=14590	GGAAUACAGGAACUUCUAAtt	UUAGAAGUUCCUGUAUUCCta						00CSI210N0
NM_003345	UBE2I	ubiquitin-conjugating enzyme E2I (UBC9 homolog, yeast)	7329	s14591	0.25 nmole	5,6,5,5	http://www.ambion.com/catalog/exon_sirna.php?id=14591	CCACCAUUAUUUCACCCGAtt	UCGGGUGAAAUAAUGGUGGtt						00CSI20XK6
NM_001076683	UBTF	upstream binding transcription factor, RNA polymerase I	7343	s14613	0.25 nmole	15	http://www.ambion.com/catalog/exon_sirna.php?id=14613	CCAUGAACGGUUACCAGAAtt	UUCUGGUAACCGUUCAUGGga						00CSI20R42
NM_001076683	UBTF	upstream binding transcription factor, RNA polymerase I	7343	s14614	0.25 nmole	4	http://www.ambion.com/catalog/exon_sirna.php?id=14614	GUACAUUGACAGAAUUGAUtt	AUCAAUUCUGUCAAUGUACgg						00CSI20CAV
NM_001076683	UBTF	upstream binding transcription factor, RNA polymerase I	7343	s14615	0.25 nmole	11	http://www.ambion.com/catalog/exon_sirna.php?id=14615	GAGAAGAUGCUGAACAUCAtt	UGAUGUUCAGCAUCUUCUCtt						00CSI20R4Z
NM_015045	WAPAL	wings apart-like homolog (Drosophila)	23063	s22947	0.25 nmole	2	http://www.ambion.com/catalog/exon_sirna.php?id=22947	GCAGUUCAAAAUUCGAUGAtt	UCAUCGAAUUUUGAACUGCca						00CSI0AH09
NM_015045	WAPAL	wings apart-like homolog (Drosophila)	23063	s22948	0.25 nmole	10	http://www.ambion.com/catalog/exon_sirna.php?id=22948	CCUUACUUCUAAACGAGCAtt	UGCUCGUUUAGAAGUAAGGga						00CSI23T53
NM_015045	WAPAL	wings apart-like homolog (Drosophila)	23063	s22949	0.25 nmole	3	http://www.ambion.com/catalog/exon_sirna.php?id=22949	GCAACUUCUAAGACUACUAtt	UAGUAGUCUUAGAAGUUGCaa						00CSI0AXGK
